# Supplementary material for: Surface analysis of curved polymeric plates irradiated with proton and ion beams
Source: Royal Society of Chemistry journal article supplement (doi:10.1039/c8ra06636a), 2018-01-01
Supplement: c8ra06636a1.pdf [file c8ra06636a1.pdf]

**Supplementary Information:**

**Surface analysis of curved polymeric plates irradiated with proton  
and ion beam**

Young Seok Song<sup>a</sup>, Chul Kang<sup>a</sup>, Jiwon Jeong<sup>a</sup>, Minji Kim<sup>b</sup>, Eunju Lim<sup>b\*</sup>

<sup>a</sup>Department of Fiber System Engineering, Dankook University, Yongin 448-701, Korea

<sup>b</sup>Department of Science Education/ Creative Convergence Manufacturing Engineering,  
Dankook University, Yongin 448-701, Korea

\* Corresponding author: Eunju Lim

Tel.: +82-31-8005-3217; E-mail: elim@dankook.ac.kr

## 1. Material and experiment

Figure S1 shows the molecular structure of polycarbonate used in this study.

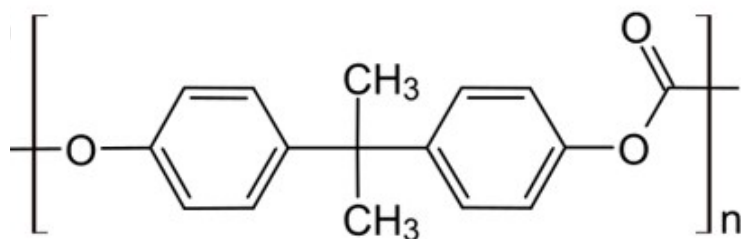

**Fig. S1.** Molecular structure of polycarbonate.

Figure S2 presents a schematic illustration of treatment with proton and nitrogen ion beams.

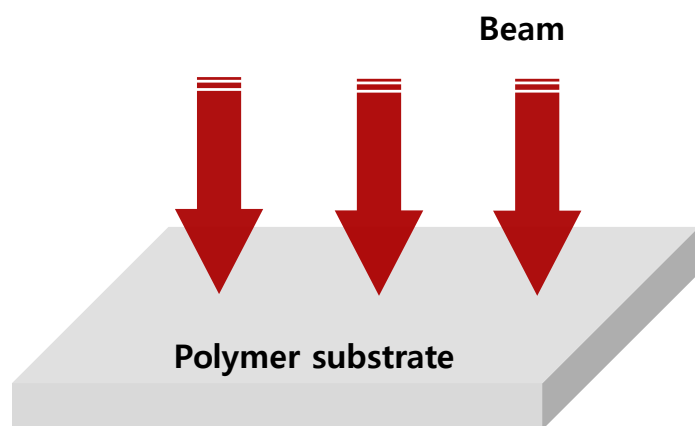

**Fig. S2.** Schematic illustration of treatment with proton and nitrogen ion beams.

## 2. Results

The following tables present the glass transition temperature of the samples prepared in this study.

| <b>Tg[°C] of PC with Proton beam</b> |                        |                        |                        |                        |
|--------------------------------------|------------------------|------------------------|------------------------|------------------------|
| <b>None</b>                          | <b>10<sup>11</sup></b> | <b>10<sup>12</sup></b> | <b>10<sup>13</sup></b> | <b>10<sup>14</sup></b> |
| 138.5                                | 138                    | 137.5                  | 138                    | 124.5                  |

| <b>Tg[°C] of PC with Nitrogen ion beam</b> |                        |                        |                        |                        |
|--------------------------------------------|------------------------|------------------------|------------------------|------------------------|
| <b>None</b>                                | <b>10<sup>14</sup></b> | <b>10<sup>15</sup></b> | <b>10<sup>16</sup></b> | <b>10<sup>17</sup></b> |
| 138.5                                      | 137.46                 | 135.98                 | 135.88                 | 136.76                 |
